# Supplementary material for: Monodispersed hierarchical Co3O4spheres intertwined with carbon nanotubes for use as anode materials in sodium-ion batteries
Source: Royal Society of Chemistry journal article supplement (doi:10.1039/c4ta02516d), 2014-06-27
Supplement: c4ta02516d1.pdf [file c4ta02516d1.pdf]

Support information for

# Monodispersed Hierarchical $\text{Co}_3\text{O}_4$ Spheres Intertwined with Carbon Nanotubes as Anode Material for Sodium-ion Batteries

Zelang Jian,<sup>a†</sup> Pan Liu,<sup>b†</sup> Fujun Li,<sup>a</sup> Mingwei Chen,<sup>b</sup> Haoshen Zhou<sup>a,c\*</sup>

<sup>a</sup> Energy Technology Research Institute, National Institute of Advanced Industrial Science and Technology (AIST), Umezono 1-1-1, Tsukuba, 305-8568, Japan.

<sup>b</sup> WPI Advanced Institute for Materials Research, Tohoku University, Sendai, 980-8577, Japan CREST, JST, 4-1-8 Honcho Kawaguchi, Saitama, 332-0012, Japan.

<sup>c</sup> National Laboratory of Solid State Microstructures & Department of Energy Science and Engineering, Nanjing University, Nanjing, 210093, China

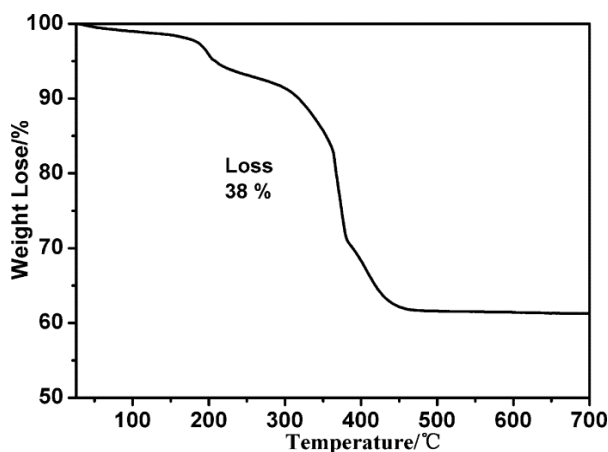

Figure S1 Thermogravimetric curve of the  $\text{Co}_3\text{O}_4$ @CNTs composite

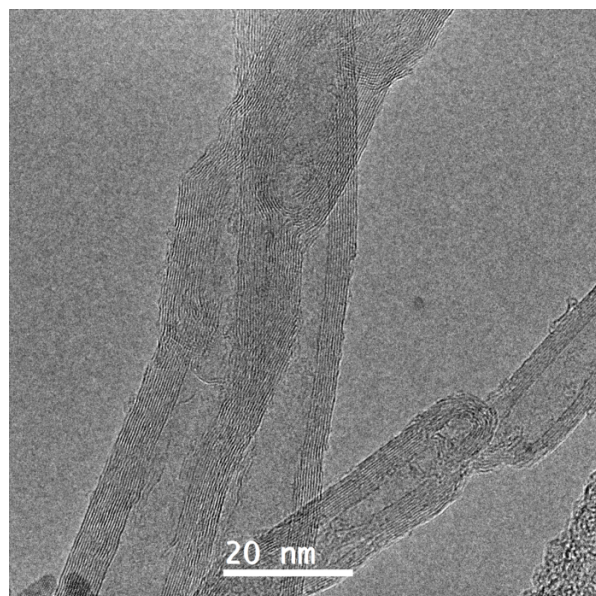

Figure S2 TEM image of pure CNTs

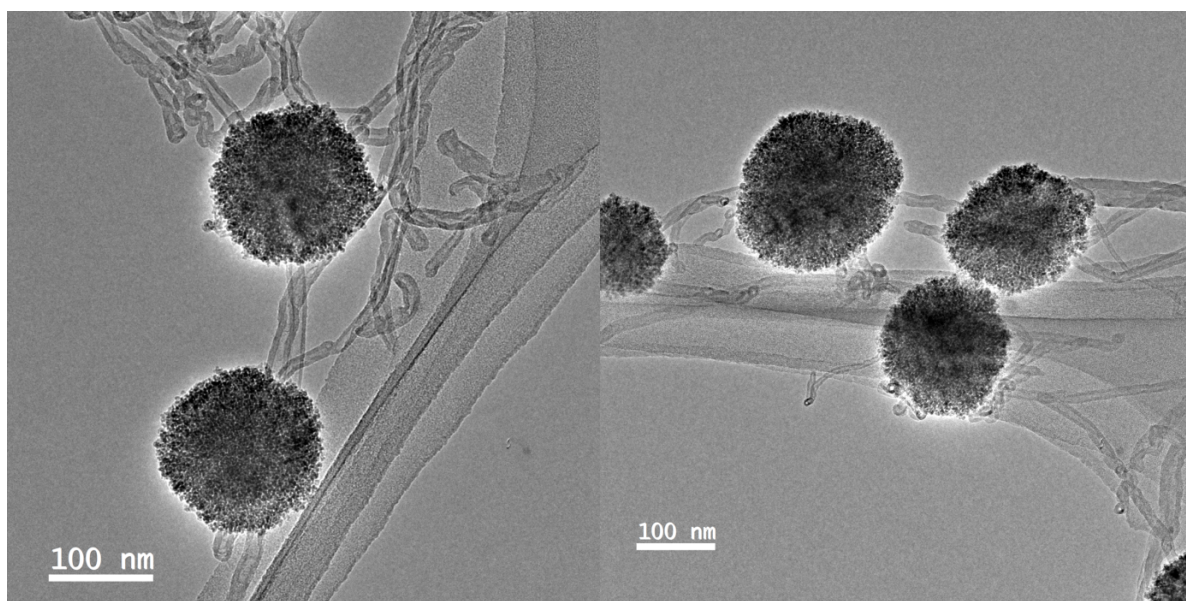

Figure S3 TEM images of the Co<sub>3</sub>O<sub>4</sub>@CNTs composite

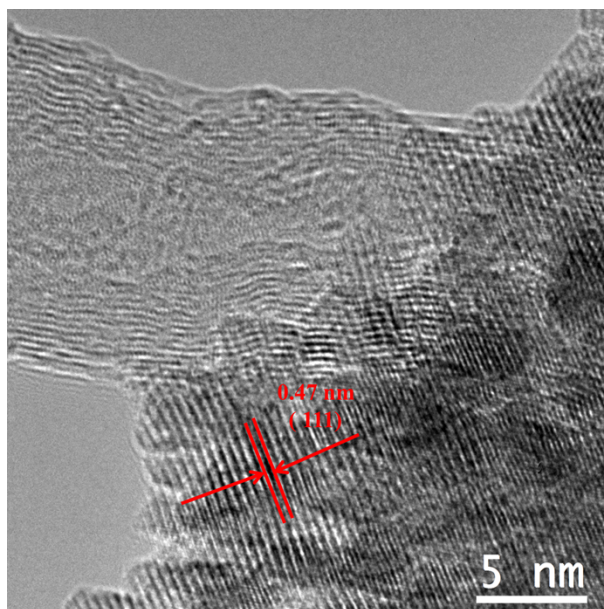

Figure S4 HRTEM image of the  $\text{Co}_3\text{O}_4@\text{CNTs}$  composite

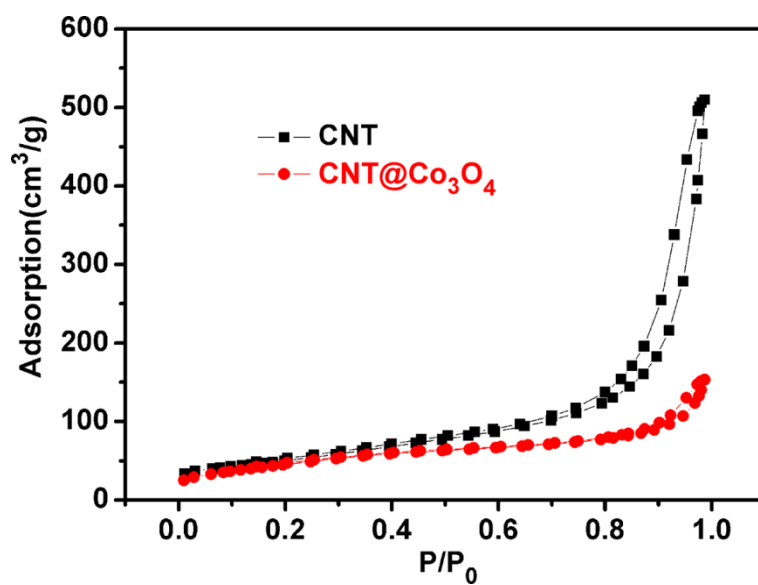

Figure S5  $\text{N}_2$  adsorption–desorption isotherms of the pure CNTs and  $\text{Co}_3\text{O}_4@\text{CNTs}$  composite.

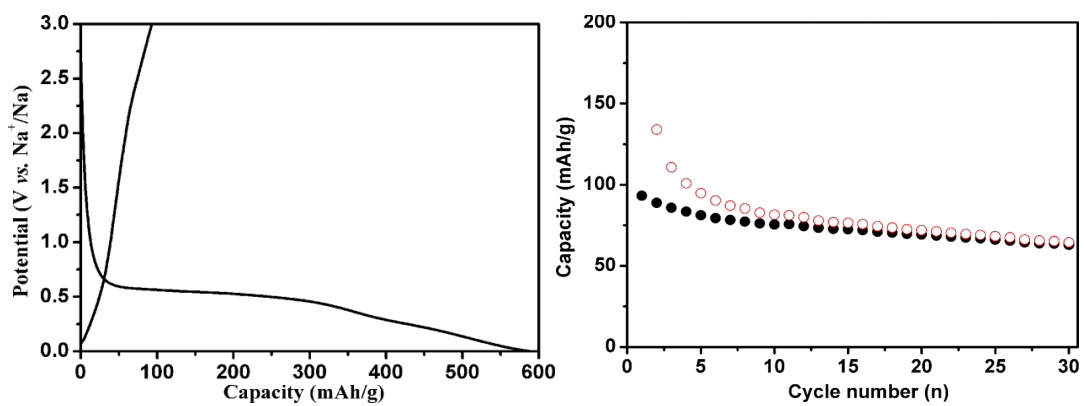

Figure S6 Galvanostatic discharge/charge curves and cycling performance of pure CNTs
